# Supplementary material for: Concordant Biogeographic Patterns among Multiple Taxonomic Groups in the Mexican Freshwater Biota
Source: PubMed Central journal article supplement (PMC4138176; doi:10.1371/journal.pone.0105510), 2014-08-19
Supplement: pone.0105510.s004.pdf [file pone.0105510.s004.pdf]

|                  |                 |                     |                |                                           |   |   |   |   |   |   |   |   |   |
|------------------|-----------------|---------------------|----------------|-------------------------------------------|---|---|---|---|---|---|---|---|---|
| Echinorhynchidae | Echinorhynchida | Palaeacanthocephala | Acanthocephala | <i>Acanthocephalus amini</i>              | 0 | 0 | 0 | 0 | 0 | 0 | 0 | 0 | 0 |
| Capillariidae    | Enoplida        | Adenophorea         | Nematoda       | <i>Capillaria cyprinodonticola</i>        | 0 | 0 | 0 | 0 | 1 | 1 | 0 | 0 | 0 |
| Capillariidae    | Enoplida        | Adenophorea         | Nematoda       | <i>Capillaria (H.) cichlasomae</i>        | 0 | 0 | 0 | 0 | 0 | 0 | 0 | 0 | 0 |
| Capillariidae    | Enoplida        | Adenophorea         | Nematoda       | <i>Capillostrongyloides sp.</i>           | 0 | 0 | 0 | 0 | 0 | 0 | 0 | 0 | 0 |
| Capillariidae    | Enoplida        | Adenophorea         | Nematoda       | <i>Paracapillaria rhamdiae</i>            | 0 | 0 | 0 | 0 | 0 | 0 | 0 | 0 | 1 |
| Capillariidae    | Enoplida        | Adenophorea         | Nematoda       | <i>Paracapillaria teixeirafreitasi</i>    | 0 | 0 | 1 | 0 | 0 | 0 | 0 | 0 | 0 |
| Capillariidae    | Enoplida        | Adenophorea         | Nematoda       | <i>Paracapillaroides agnostomi</i>        | 0 | 0 | 1 | 0 | 0 | 0 | 0 | 0 | 0 |
| Capillariidae    | Enoplida        | Adenophorea         | Nematoda       | <i>Pseudocapillaria (l.) ophisterni</i>   | 0 | 0 | 0 | 0 | 0 | 0 | 0 | 0 | 0 |
| Capillariidae    | Enoplida        | Adenophorea         | Nematoda       | <i>Pseudocapillaria tomentosa</i>         | 0 | 0 | 0 | 0 | 0 | 0 | 0 | 0 | 0 |
| Capillariidae    | Enoplida        | Adenophorea         | Nematoda       | <i>Pseudocapillaria yucatanensis</i>      | 0 | 0 | 0 | 0 | 0 | 0 | 0 | 0 | 0 |
| Cystoosidae      | Enoplida        | Adenophorea         | Nematoda       | <i>Cystoopsis atractostei</i>             | 0 | 0 | 0 | 0 | 0 | 0 | 0 | 0 | 0 |
| Anisakidae       | Ascaridida      | Secernentea         | Nematoda       | <i>Goezia nonipapillata</i>               | 0 | 0 | 0 | 0 | 0 | 1 | 0 | 0 | 0 |
| Anisakidae       | Ascaridida      | Secernentea         | Nematoda       | <i>Goezia sp. (ex.: Ictaluridae)</i>      | 0 | 0 | 0 | 0 | 0 | 1 | 0 | 0 | 0 |
| Anisakidae       | Ascaridida      | Secernentea         | Nematoda       | <i>Hysterothylacium cenotae</i>           | 0 | 0 | 0 | 0 | 0 | 0 | 0 | 0 | 1 |
| Atractidae       | Ascaridina      | Secernentea         | Nematoda       | <i>Atractis bravoae</i>                   | 0 | 0 | 0 | 0 | 0 | 1 | 0 | 0 | 0 |
| Atractidae       | Ascaridina      | Secernentea         | Nematoda       | <i>Atractis vidali</i>                    | 0 | 0 | 0 | 0 | 0 | 0 | 0 | 0 | 0 |
| Atractidae       | Ascaridina      | Secernentea         | Nematoda       | <i>Orientattractis campechensis</i>       | 0 | 0 | 0 | 0 | 0 | 0 | 0 | 0 | 0 |
| Atractidae       | Ascaridina      | Secernentea         | Nematoda       | <i>Orientattractis chiapasensis</i>       | 0 | 0 | 0 | 0 | 0 | 0 | 0 | 0 | 0 |
| Camallanidae     | Camallanida     | Secernentea         | Nematoda       | <i>Procamallanus (S.) gobiomori</i>       | 0 | 0 | 1 | 0 | 0 | 0 | 0 | 0 | 0 |
| Camallanidae     | Camallanida     | Secernentea         | Nematoda       | <i>Procamallanus (S.) jaliscensis</i>     | 0 | 0 | 1 | 0 | 1 | 0 | 0 | 0 | 0 |
| Camallanidae     | Camallanida     | Secernentea         | Nematoda       | <i>Procamallanus (S.) neocaballeroi</i>   | 0 | 0 | 0 | 0 | 0 | 0 | 0 | 0 | 0 |
| Camallanidae     | Camallanida     | Secernentea         | Nematoda       | <i>Procamallanus (S.) rebecca</i>         | 0 | 0 | 0 | 0 | 0 | 0 | 0 | 0 | 1 |
| Cosmocercidae    | Ascaridida      | Secernentea         | Nematoda       | <i>Raillietnema kritscheri</i>            | 0 | 0 | 0 | 0 | 0 | 1 | 0 | 0 | 0 |
| Cucullanidae     | Ascaridida      | Secernentea         | Nematoda       | <i>Cucullanus angeli</i>                  | 0 | 0 | 0 | 1 | 0 | 1 | 0 | 0 | 0 |
| Cucullanidae     | Ascaridida      | Secernentea         | Nematoda       | <i>Cucullanus (Cucullanus) caballeroi</i> | 0 | 0 | 0 | 0 | 0 | 0 | 0 | 0 | 0 |
| Cucullanidae     | Ascaridida      | Secernentea         | Nematoda       | <i>Cucullanus mexicanus</i>               | 0 | 0 | 0 | 0 | 0 | 0 | 0 | 0 | 0 |
| Cucullanidae     | Ascaridida      | Secernentea         | Nematoda       | <i>Dichelyne mexicanus</i>                | 0 | 0 | 0 | 0 | 0 | 0 | 0 | 0 | 0 |
| Cucullanidae     | Ascaridida      | Secernentea         | Nematoda       | <i>Neocucullanus neocucullanus</i>        | 0 | 0 | 0 | 0 | 0 | 0 | 0 | 0 | 0 |
| Cystidicolidae   | Spirurida       | Secernentea         | Nematoda       | <i>Spinitectus agnostomi</i>              | 0 | 0 | 0 | 0 | 1 | 0 | 0 | 0 | 0 |
| Cystidicolidae   | Spirurida       | Secernentea         | Nematoda       | <i>Spinitectus humbertoi</i>              | 0 | 0 | 0 | 0 | 0 | 0 | 1 | 0 | 1 |
| Cystidicolidae   | Spirurida       | Secernentea         | Nematoda       | <i>Spinitectus mariaisabelae</i>          | 0 | 0 | 0 | 0 | 0 | 0 | 0 | 0 | 0 |
| Cystidicolidae   | Spirurida       | Secernentea         | Nematoda       | <i>Spinitectus mexicanus</i>              | 0 | 0 | 0 | 0 | 0 | 0 | 0 | 0 | 0 |
| Cystidicolidae   | Spirurida       | Secernentea         | Nematoda       | <i>Spinitectus osorioi</i>                | 0 | 0 | 0 | 0 | 0 | 0 | 0 | 0 | 0 |
| Cystidicolidae   | Spirurida       | Secernentea         | Nematoda       | <i>Spinitectus tabascoensis</i>           | 0 | 0 | 0 | 0 | 0 | 0 | 0 | 0 | 0 |
| Daniconeematidae | Spirurida       | Secernentea         | Nematoda       | <i>Mexiconema cichlasomae</i>             | 0 | 0 | 0 | 0 | 0 | 0 | 0 | 0 | 0 |
| Philometridae    | Camallanida     | Secernentea         | Nematoda       | <i>Neophilometroides caudatus</i>         | 0 | 0 | 0 | 0 | 0 | 0 | 0 | 0 | 0 |
| Philometridae    | Camallanida     | Secernentea         | Nematoda       | <i>Philometra ophisterni</i>              | 0 | 0 | 0 | 0 | 0 | 0 | 0 | 0 | 0 |
| Philometridae    | Camallanida     | Secernentea         | Nematoda       | <i>Philometra poblana</i>                 | 0 | 0 | 0 | 0 | 0 | 1 | 0 | 0 | 0 |
| Philometridae    | Camallanida     | Secernentea         | Nematoda       | <i>Philometridae gen. sp.</i>             | 0 | 0 | 0 | 0 | 0 | 0 | 0 | 0 | 0 |
| Quimperiidae     | Ascaridida      | Secernentea         | Nematoda       | <i>Gibsonnema ophisterni</i>              | 0 | 0 | 0 | 0 | 0 | 0 | 0 | 0 | 0 |
| Rhabdochoniidae  | Spirurida       | Secernentea         | Nematoda       | <i>Beaninema nayaritense</i>              | 0 | 0 | 0 | 1 | 0 | 0 | 0 | 0 | 0 |
| Rhabdochoniidae  | Spirurida       | Secernentea         | Nematoda       | <i>Rhabdochona acuminata</i>              | 0 | 0 | 0 | 0 | 0 | 0 | 0 | 0 | 0 |
| Rhabdochoniidae  | Spirurida       | Secernentea         | Nematoda       | <i>Rhabdochona ahuehuellensis</i>         | 0 | 0 | 0 | 0 | 1 | 1 | 0 | 0 | 0 |
| Rhabdochoniidae  | Spirurida       | Secernentea         | Nematoda       | <i>Rhabdochona canadensis</i>             | 0 | 0 | 0 | 0 | 0 | 1 | 0 | 1 | 0 |
| Rhabdochoniidae  | Spirurida       | Secernentea         | Nematoda       | <i>Rhabdochona cascadilla</i>             | 1 | 0 | 0 | 0 | 0 | 0 | 0 | 0 | 0 |
| Rhabdochoniidae  | Spirurida       | Secernentea         | Nematoda       | <i>Rhabdochona catostomi</i>              | 0 | 0 | 0 | 0 | 0 | 0 | 0 | 0 | 0 |
| Rhabdochoniidae  | Spirurida       | Secernentea         | Nematoda       | <i>Rhabdochona chimalapensis</i>          | 0 | 0 | 0 | 0 | 0 | 0 | 0 | 0 | 0 |
| Rhabdochoniidae  | Spirurida       | Secernentea         | Nematoda       | <i>Rhabdochona guerreroensis</i>          | 0 | 0 | 0 | 0 | 1 | 0 | 1 | 0 | 0 |
| Rhabdochoniidae  | Spirurida       | Secernentea         | Nematoda       | <i>Rhabdochona kidderi</i>                | 0 | 0 | 0 | 1 | 1 | 1 | 0 | 0 | 1 |
| Rhabdochoniidae  | Spirurida       | Secernentea         | Nematoda       | <i>Rhabdochona lichtenfelsi</i>           | 0 | 0 | 0 | 0 | 1 | 1 | 0 | 0 | 0 |
| Rhabdochoniidae  | Spirurida       | Secernentea         | Nematoda       | <i>Rhabdochona mexicana</i>               | 0 | 0 | 0 | 0 | 1 | 1 | 0 | 1 | 0 |
| Rhabdochoniidae  | Spirurida       | Secernentea         | Nematoda       | <i>Rhabdochona salgadoi</i>               | 0 | 0 | 0 | 0 | 0 | 0 | 1 | 1 | 1 |
| Rhabdochoniidae  | Spirurida       | Secernentea         | Nematoda       | <i>Rhabdochona xiphophori</i>             | 0 | 0 | 0 | 1 | 1 | 1 | 0 | 0 | 1 |
